# Supplementary material for: Beneficial roles of the AhR ligand FICZ on the regenerative potentials of BMSCs and primed cartilage templates
Source: Royal Society of Chemistry journal article supplement (doi:10.1039/d2ra00622g), 2022-01-01
Supplement: d2ra00622g1.pdf [file d2ra00622g1.pdf]

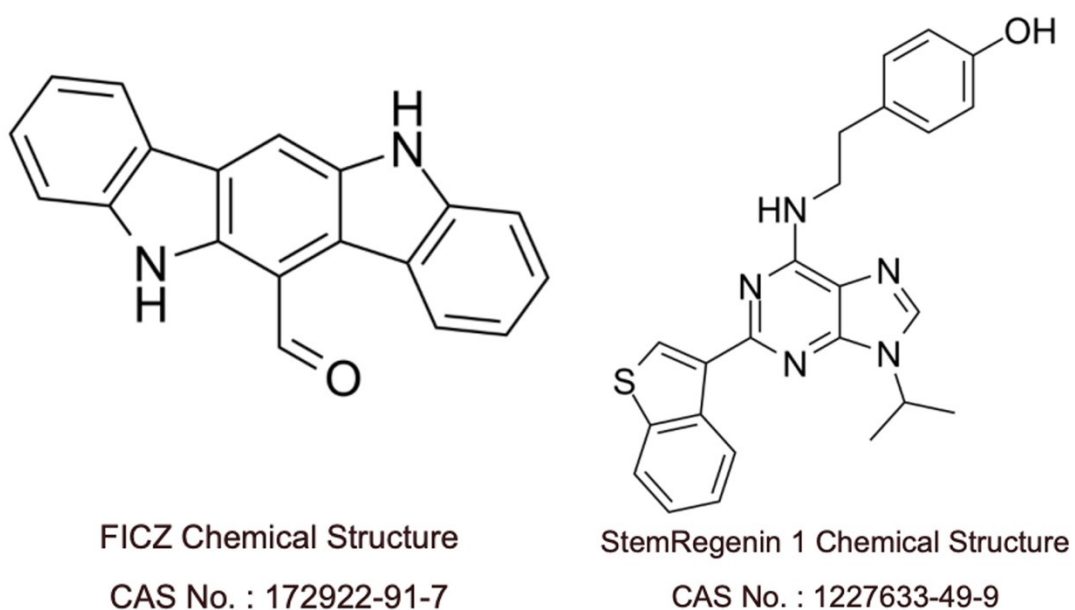

Figure S1 The chemical structures of FICZ (left) and SR1 (right) (quoted from MCE website).

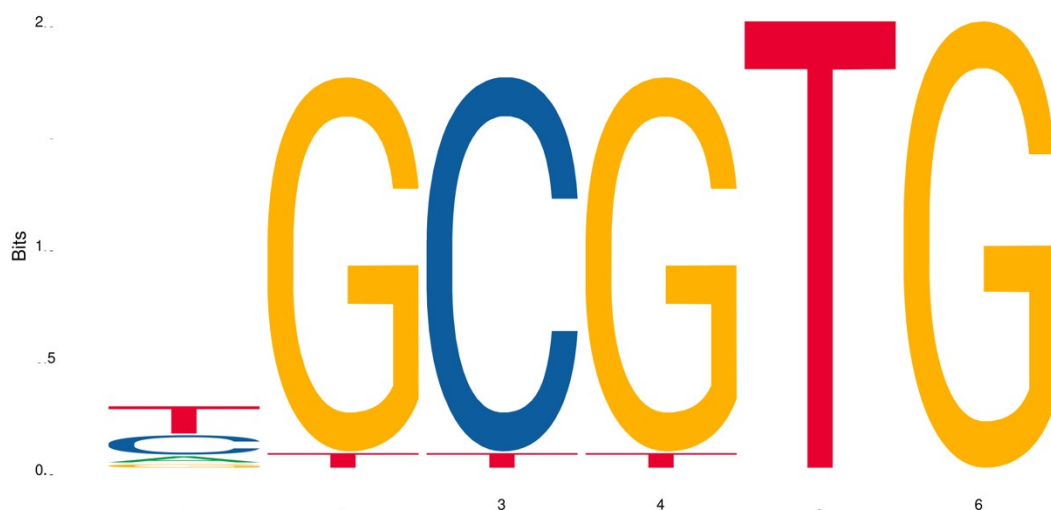

Figure S2. AhR/ARNT motif (quoted from JASPAR website)

Table S1. Predicted binding sites of CYP1A1, Gpc3, Smpd3 and AhR/ARNT (quoted from JASPAR website)

| Matrix ID | Name      | Score   | Relative score | Sequence ID (Cyp1a1)           | Start | End | Strand | Predicted sequence |
|-----------|-----------|---------|----------------|--------------------------------|-------|-----|--------|--------------------|
| MA0006.1  | Ahr::Arnt | 6.15805 | 0.853842612    | NC_000075.6:c57704424-57703824 | 58    | 63  | -      | TGTGTG             |
| MA0006.1  | Ahr::Arnt | 6.15805 | 0.853842612    | NC_000075.6:c57704424-57703824 | 60    | 65  | -      | TGTGTG             |
| MA0006.1  | Ahr::Arnt | 6.15805 | 0.853842612    | NC_000075.6:c57704424-57703824 | 62    | 67  | -      | TGTGTG             |
| MA0006.1  | Ahr::Arnt | 6.15805 | 0.853842612    | NC_000075.6:c57704424-57703824 | 591   | 596 | -      | TGTGTG             |
| MA0006.1  | Ahr::Arnt | 5.29689 | 0.81730469     | NC_000075.6:c57704424-57703824 | 126   | 131 | +      | TGAGTG             |
| MA0006.1  | Ahr::Arnt | 5.23853 | 0.814828622    | NC_000075.6:c57704424-57703824 | 361   | 366 | +      | TGCGTC             |

| Matrix ID | Name      | Score   | Relative score | Sequence ID (Gpc3)             | Start | End | Strand | Predicted sequence |
|-----------|-----------|---------|----------------|--------------------------------|-------|-----|--------|--------------------|
| MA0006.1  | Ahr.:Arnt | 8.06995 | 0.934962247    | NC_000086.7:c52614574-52613974 | 271   | 276 | +      | AGCGTG             |
| MA0006.1  | Ahr.:Arnt | 8.06995 | 0.934962247    | NC_000086.7:c52614574-52613974 | 374   | 379 | -      | AGCGTG             |
| MA0006.1  | Ahr.:Arnt | 7.68027 | 0.918428643    | NC_000086.7:c52614574-52613974 | 460   | 465 | -      | GGCGTG             |
| MA0006.1  | Ahr.:Arnt | 7.68027 | 0.918428643    | NC_000086.7:c52614574-52613974 | 498   | 503 | -      | GGCGTG             |
| MA0006.1  | Ahr.:Arnt | 7.68027 | 0.918428643    | NC_000086.7:c52614574-52613974 | 557   | 562 | -      | GGCGTG             |
| MA0006.1  | Ahr.:Arnt | 6.15805 | 0.853842612    | NC_000086.7:c52614574-52613974 | 63    | 68  | +      | TGTGTG             |
| MA0006.1  | Ahr.:Arnt | 6.15805 | 0.853842612    | NC_000086.7:c52614574-52613974 | 65    | 70  | +      | TGTGTG             |
| MA0006.1  | Ahr.:Arnt | 6.15805 | 0.853842612    | NC_000086.7:c52614574-52613974 | 67    | 72  | +      | TGTGTG             |
| MA0006.1  | Ahr.:Arnt | 6.15805 | 0.853842612    | NC_000086.7:c52614574-52613974 | 69    | 74  | +      | TGTGTG             |
| MA0006.1  | Ahr.:Arnt | 6.15805 | 0.853842612    | NC_000086.7:c52614574-52613974 | 71    | 76  | +      | TGTGTG             |
| MA0006.1  | Ahr.:Arnt | 6.15805 | 0.853842612    | NC_000086.7:c52614574-52613974 | 73    | 78  | +      | TGTGTG             |
| MA0006.1  | Ahr.:Arnt | 6.15805 | 0.853842612    | NC_000086.7:c52614574-52613974 | 75    | 80  | +      | TGTGTG             |
| MA0006.1  | Ahr.:Arnt | 6.15805 | 0.853842612    | NC_000086.7:c52614574-52613974 | 77    | 82  | +      | TGTGTG             |
| MA0006.1  | Ahr.:Arnt | 6.15805 | 0.853842612    | NC_000086.7:c52614574-52613974 | 79    | 84  | +      | TGTGTG             |
| MA0006.1  | Ahr.:Arnt | 6.15805 | 0.853842612    | NC_000086.7:c52614574-52613974 | 81    | 86  | +      | TGTGTG             |
| MA0006.1  | Ahr.:Arnt | 6.15805 | 0.853842612    | NC_000086.7:c52614574-52613974 | 83    | 88  | +      | TGTGTG             |
| MA0006.1  | Ahr.:Arnt | 6.15805 | 0.853842612    | NC_000086.7:c52614574-52613974 | 85    | 90  | +      | TGTGTG             |
| MA0006.1  | Ahr.:Arnt | 6.15805 | 0.853842612    | NC_000086.7:c52614574-52613974 | 87    | 92  | +      | TGTGTG             |
| MA0006.1  | Ahr.:Arnt | 6.15805 | 0.853842612    | NC_000086.7:c52614574-52613974 | 89    | 94  | +      | TGTGTG             |
| MA0006.1  | Ahr.:Arnt | 6.15805 | 0.853842612    | NC_000086.7:c52614574-52613974 | 91    | 96  | +      | TGTGTG             |
| MA0006.1  | Ahr.:Arnt | 6.15805 | 0.853842612    | NC_000086.7:c52614574-52613974 | 93    | 98  | +      | TGTGTG             |
| MA0006.1  | Ahr.:Arnt | 6.15805 | 0.853842612    | NC_000086.7:c52614574-52613974 | 95    | 100 | +      | TGTGTG             |
| MA0006.1  | Ahr.:Arnt | 6.15805 | 0.853842612    | NC_000086.7:c52614574-52613974 | 97    | 102 | +      | TGTGTG             |
| MA0006.1  | Ahr.:Arnt | 5.75182 | 0.836607052    | NC_000086.7:c52614574-52613974 | 372   | 377 | -      | CGTGTG             |
| MA0006.1  | Ahr.:Arnt | 5.29689 | 0.81730469     | NC_000086.7:c52614574-52613974 | 32    | 37  | +      | TGGGTG             |
| MA0006.1  | Ahr.:Arnt | 5.29689 | 0.81730469     | NC_000086.7:c52614574-52613974 | 275   | 280 | +      | TGCCTG             |
| MA0006.1  | Ahr.:Arnt | 5.29689 | 0.81730469     | NC_000086.7:c52614574-52613974 | 510   | 515 | -      | TGCCTG             |
| MA0006.1  | Ahr.:Arnt | 5.23853 | 0.814828622    | NC_000086.7:c52614574-52613974 | 465   | 470 | -      | TGCGGG             |
| MA0006.1  | Ahr.:Arnt | 5.23853 | 0.814828622    | NC_000086.7:c52614574-52613974 | 472   | 477 | -      | TGCGGG             |
| MA0006.1  | Ahr.:Arnt | 5.23853 | 0.814828622    | NC_000086.7:c52614574-52613974 | 586   | 591 | -      | TGCGGG             |
| MA0006.1  | Ahr.:Arnt | 4.89067 | 0.800069129    | NC_000086.7:c52614574-52613974 | 59    | 64  | +      | CGGGTG             |
| MA0006.1  | Ahr.:Arnt | 4.89067 | 0.800069129    | NC_000086.7:c52614574-52613974 | 339   | 344 | +      | CGAGTG             |

  

| Matrix ID | Name      | Score   | Relative score | Sequence ID (Smpd3)              | Start | End | Strand | Predicted sequence |
|-----------|-----------|---------|----------------|----------------------------------|-------|-----|--------|--------------------|
| MA0006.1  | Ahr.:Arnt | 5.75182 | 0.836607052    | NC_000074.6:c106338565-106337965 | 394   | 399 | -      | CTCGTG             |
| MA0006.1  | Ahr.:Arnt | 5.29689 | 0.81730469     | NC_000074.6:c106338565-106337965 | 435   | 440 | -      | TGCCTG             |
| MA0006.1  | Ahr.:Arnt | 5.23853 | 0.814828622    | NC_000074.6:c106338565-106337965 | 525   | 530 | +      | TGCGTC             |
| MA0006.1  | Ahr.:Arnt | 4.89067 | 0.800069129    | NC_000074.6:c106338565-106337965 | 105   | 110 | +      | CGAGTG             |
